# Supplementary material for: Bioinformatic Screening of Autoimmune Disease Genes and Protein Structure Prediction with FAMS for Drug Discovery
Source: PubMed Central journal article supplement — Protein Pept Lett. 2014 Aug;21(8):828–39. doi: 10.2174/09298665113209990052 (PMC4141326; doi:10.2174/09298665113209990052), 2014-08
Supplement: PPL-21-828_SD2.pdf [file PPL-21-828_SD2.pdf]

# Supplementary Document

Shigeharu Ishida,<sup>†</sup> Hideaki Umeyama,<sup>‡</sup> Mitsuo Iwadate,<sup>‡</sup> and Y-H. Taguchi<sup>\*,†</sup>

*Department of Physics, Chuo University, Tokyo 112-8551, Japan, and Department of Biological Sciences, Chuo University, Tokyo 112-8551, Japan*

E-mail: tag@granular.com

## Thresholds and criteria for selection

Even if we develop a *score* that measures the importance of genes and we rank all genes based on this score, there are no strict criteria available that could be used to decide how many genes we should consider as significant for three autoimmune diseases. If we consider larger numbers of genes, although their significance decreases monotonically, this would allow us to analyze more factors that may have critical roles in three autoimmune diseases. However, using a limited number of genes increases significance but may be too stringent. Therefore, for practical use, a threshold value can be chosen to keep consistency between gene selections for each disease.

As described in the main text, we selected genes for each disease as follows:

- SLE: a set of genes  $G_{\text{SLE}}$  is defined as

$$G_{\text{SLE}} \equiv \{g \mid \text{PC2}_g < d\}$$

---

\*To whom correspondence should be addressed

<sup>†</sup>Department of Physics, Chuo University, Tokyo 112-8551, Japan

<sup>‡</sup>Department of Biological Sciences, Chuo University, Tokyo 112-8551, Japan

- RA: a set of genes  $G_{\text{RA}}$  is defined as

$$G_{\text{RA}} \equiv \{g \mid \text{PC}2_g > d\}$$

- DM: a set of genes  $G_{\text{DM}}$  is defined as

$$G_{\text{DM}} \equiv \{g \mid \text{PC}3_g < d\}$$

where  $\text{PC}N_g$  is the  $N$ th principal component score of  $g$ th gene and  $d$  is the threshold value. Then we computed the ratio  $r$  of the number of genes commonly selected for three diseases to the number of genes selected for a single disease,

$$r \equiv \frac{N(G_{\text{SLE}} \cap G_{\text{RA}} \cap G_{\text{DM}})}{N(G_{\text{SLE}} \cup G_{\text{RA}} \cup G_{\text{DM}})},$$

where  $N(G)$  is the number of genes that belong to set  $G$ , as a function of  $d$  (Fig. S18). As  $d$  increases,  $r$  also increases, but as  $d$  further increases,  $r$  starts to decrease. Regarding values of  $r$ ,  $0.1 < d < 0.2$  values are equally significant. However, since a larger  $d$  implies greater significance in each selection, we chose a value of  $d = 0.2$  as a maximum that does not reduce  $r$ .

## Comparisons with previous feature selection methods

Although it was apparent that our proposed method successfully selected common genes that are critical for all three autoimmune diseases, it would be interesting to compare the standard or conventional feature selection methods to see if they were equal to or better than this method. Therefore, we compared the performance of methods employed by two previous studies[1, 2].

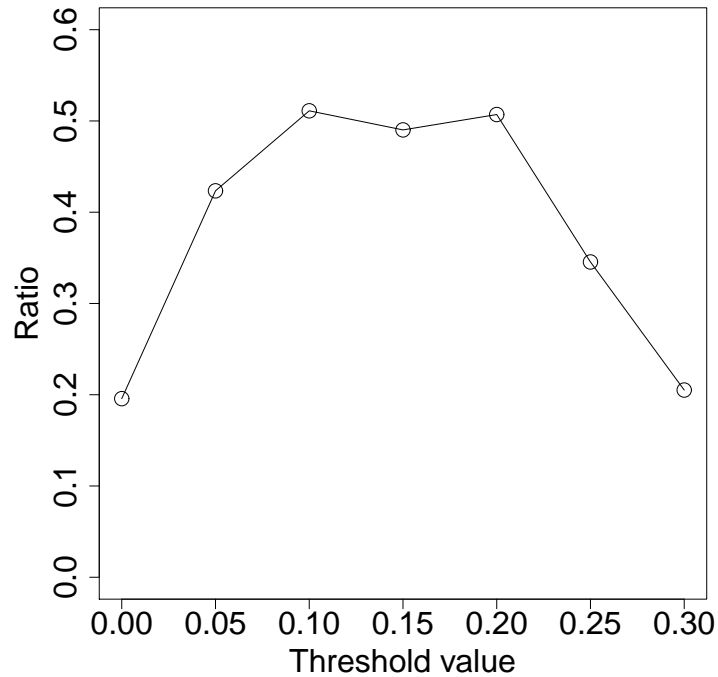

Figure S18: The dependence of the ratio  $r$  on threshold value  $d$ .

## **Weka**

Weka[3] is a popular and conventional package that includes several feature selection methods. Wang et al. [1] used Weka to check the abilities of several feature selection methods when applied to gene selection based on gene expression. Here, we applied their trials to our data set.

### **Minimum description length (MDL) based discretization**

First, we tried to discretize methylation values so we could apply ranking methods based on the discretized values similar to the study by Wang et al. However, discretization obtained by MDL based discretization methods attributed the same constant to most values of many features. This may be because we only used 20 samples, consisting of five patients and 14 or 15 healthy controls. The discretized values obtained were used for  $\chi^2$ -statistic, InfoGain, ReliafF and Symmetrical uncertainty.

## Gene selection

In Tables S2, S3, S4, and S5, we listed genes that were highly ranked based on several scores. Although we tried to rank the top 10 genes as in Wang et al., because of many tied values, this was not possible. Thus, we applied an alternative approach. As SLE had many tied top ranked genes, we first listed all of them. Then, we listed genes for RA whose number was not less than that of the genes listed in SLE but as small as possible. Because of tied values, we could not select the exact same number of highly ranked genes as in SLE. As DM always had a limited number of genes to which non-zero scores were attributed and the number was always less than those listed genes for both SLE and RA, we listed all genes to which non-zero scores were attributed in DM. In Tables S6 and S7, we listed genes selected by correlation-based feature selection (CFS) and several wrapper methods with best first criterion.

## Genes overlaps

For tables S2, S3,S4,S5,S6, and S7, we identified gene overlaps as follows:

- **Bold** indicates overlap with genes selected by the present study (Table 2).
- *Italic* indicates genes selected by only one method for each disease.
- Underlined indicates genes selected for more than one disease for each method.

It is clear that the number of bold faced genes outperforms the number of both italic and underlined genes. This demonstrates the plausibility of our method. In contrast to this, there is only one underlined gene (TES in Table S6). This suggests that none of the methods listed here have the ability to list selected genes common for three diseases. Despite this, the dependence of gene selection by the method used is low. There are few Italic faced genes. Although there is a relatively high number of Italic faced genes in Table S6, this is simply because CFS for SLE lists more genes than for other methods. Thus, any methods that make use of classification or labeling information cannot list selected genes common for three diseases.

## Random forest

Diaz-Uriarte et al. employed random forest for gene selection based on gene expression [2]. In this subsection, we tried to apply their methodology to our data set. We used varSelRF[4] (ntree = 2000, ntreeIterat = 1000, vars.drop.frac = 0.2) following the procedure described by Diaz-Uriarte et al. We executed varSelRF a number of times, but it provided only a few genes (see typical examples in Fig. S19) and the selected genes heavily fluctuated between trials. Thus, to collect enough numbers of selected genes, we executed varSelRF 100 times (see results in Table S8). The meanings of Bold, Italic and underlined are the same as those in the previous subsection. The outcome was quite similar to the previous section. Again, there were high numbers of bold faced genes and TES was the only gene selected for more than one disease. One difference was increased numbers of Italic faced genes in DM, but this reflected that very few genes were selected for DM in the previous subsection, while random forest listed more genes. In conclusion, random forest is not useful for the selection of critical genes common for three autoimmune diseases.

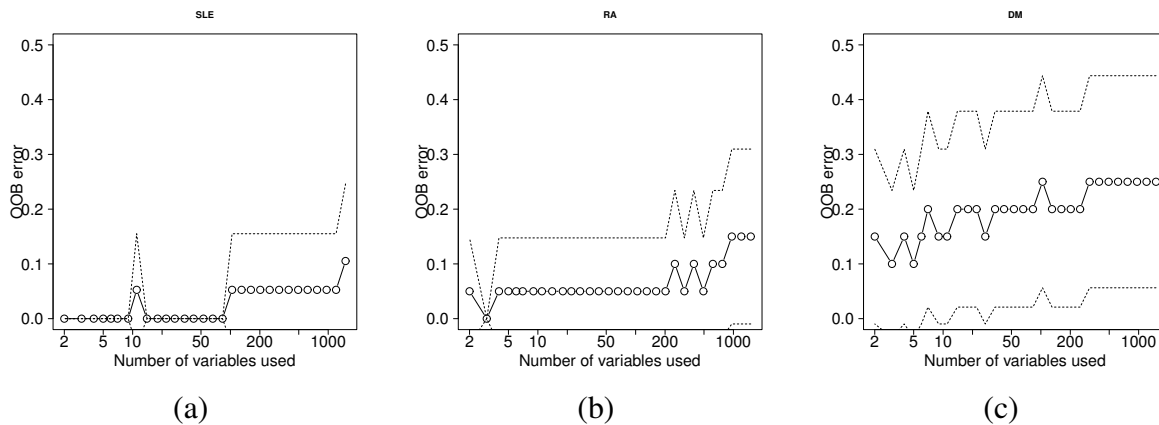

Figure S19: Typical examples of error rates of random forest as a function of the number of selected genes. Solid curves: mean, upper/lower dotted curves: upper/lower bounds, respectively. (a) SLE, selected genes are RARA\_P1076\_R and S100A2\_E36\_R. (b) RA, selected genes are PLAGL1\_P334\_F, CDC25B\_E83\_F, and ABCA1\_P45\_F. (c) DM, selected genes are ESR1\_P151\_R and IL4\_P262\_R.

## Comparisons with other data sets

Although we successfully selected important genes common for three autoimmune diseases, if we could reproduce the outcome using an independent dataset, our results would be more feasible. We could not find an identical data set, i.e., one that consisted of MZ twins of SLE, RA and DM patients with samples taken from white blood cells, so we used two similar data sets for RA[5] and SLE[6]. Here, we present the results for these two data sets.

### RA

Liu et al. [5] recently reported methylation patterns of genomes from peripheral blood lymphocytes (PBL) of RA patients and healthy controls. Since they did not collect MZ twins, they collected a large number of samples (335 patients and 354 healthy controls). Although the study did not include SLE or DM, the number of samples is huge, and therefore is a good data set to check the feasibility of our method. First, we downloaded GSE42861\_processed\_methylation\_matrix.txt.gz from GEO ID: GSE42861. Then we selected probes annotated as either TSS200 or TSS1500 to collect methylation patterns limited to promoter regions. Then, promoters of genes that exist on microarray plates used in our study were chosen. Finally, 3540 probes were chosen, more than twice as many probes as used in our study (1505). Fig. S20(a) shows two dimensional embeddings by PCA (the first and second PCs). Similar to Fig. S1(a), it shows a barb-like structure. This structure vanished after removing genes located on the X chromosome (red dots in Fig. S20(a) and see Fig. S20(b) for the embeddings after removing genes on the X chromosome). Next, we checked which PC represented the distinction between RA patients and normal controls. Fig. S21 shows the contributions of each sample to the first, second and third principal components. As expected, the first principal components have almost constant values for both RA patients and normal controls. However, the second principal components seem to represent a distinction between RA patients and normal controls. To confirm this, we applied Wilcoxon Rank sum test between the second principal components of patients and normal controls and found that  $P < 1 \times 10^{-16}$ . Thus, PC2

likely represents a distinction between RA patients and normal controls. Furthermore, the third PC may represent an odd structure that is beyond the scope of this paper.

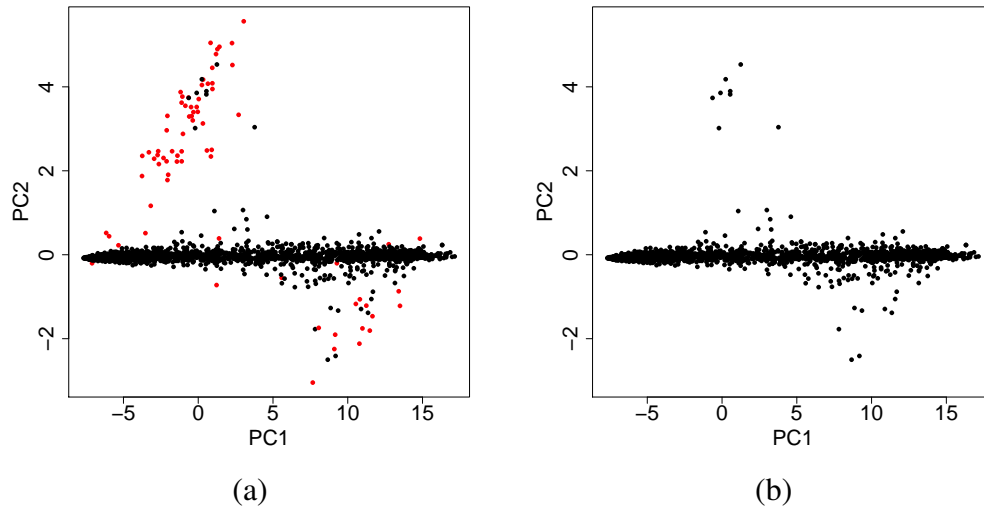

Figure S20: Two dimensional PCA embeddings of 3540 probes extracted from GEO ID: GSE41861. (a) PC1 vs PC2 before removing genes located on the X chromosome (red dots). (b) PC1 vs PC2 after removing genes located on the X chromosome.

Next, we attempted to select genes as we did in the present study (red dots in Fig. S22 and Table S9). The number of genes was not uniquely decided but we selected 40 genes. However, since more than one probe is sometimes attributed to one gene only, 34 genes were selected. In this study, we selected 36 genes among 813 genes (Table 2). Thus, the expected number of bold faced genes in Table S9 was  $34 \times \frac{36}{813} \simeq 1.5$ , which was markedly lower than the number of bold faced genes, 11, in Table S9. This strong coincidence demonstrates the feasibility of our method, if we consider the fact that samples were not taken from white blood cells (as in our study) but were extracted from peripheral blood lymphocytes (PBLs).

## SLE

Jeffries et al. [6] collected genomes from T-cells of 11 female SLE patients and 12 normal female controls. Although the number of samples was not much larger than the number of SLE sam-

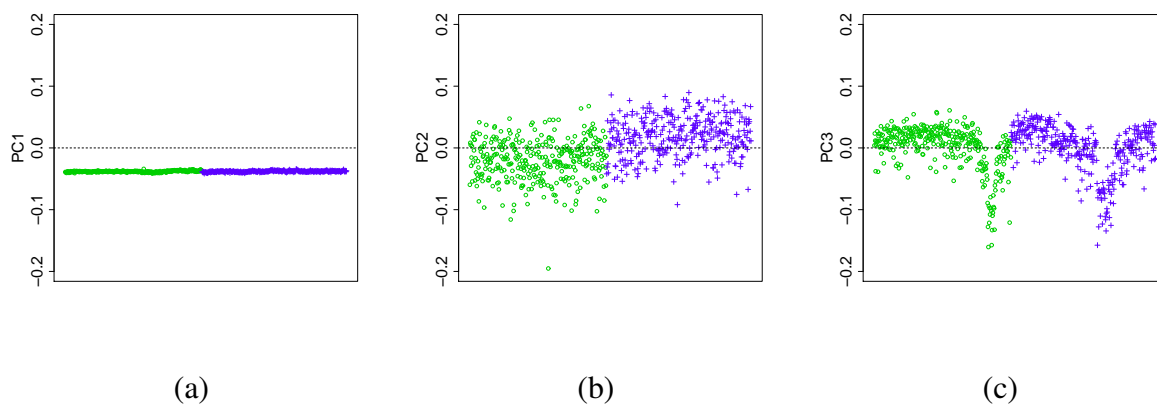

Figure S21: The first (a), second (b) and third (c) principal components. Green circles and blue crosses are RA patients and normal controls, respectively.

ples in the present study, 19 (Table 1), and did not include MZ twins, application of our method to this data set may also validate our method. Promoter methylation pattern, GSE27895\_non-normalized\_ratios.txt was downloaded from GEO ID: GSE27895. Then, probes annotated as genes that existed on our microarray plate and used in the present study were collected. The number of probes collected was 2138. Since the sample consisted only of females, there was no need to exclude genes located on the X chromosome. Figs. S23 and S24 represent two dimensional embeddings and principal components, respectively. Initially, the principal component that represents distinction between SLE patients and normal controls did not appear to exist. However, if one compares Fig. 1 from Jeffries et al. with Fig. S24(b), PC2 corresponds to Fig. 1 from Jeffries et al., which represents the expression of genes selected to represent distinctions between SLE patients and normal controls. In both Fig. 1 from Jeffries et al. and Fig. S24(b), Control 9, 10 and 12 have a distinct expression from other control samples. PC2 simply reflects this feature correctly. It should be noted that this kind of anomaly, i.e., diversity not between but within normal controls or patient samples, was also observed in the present study. We also noted that promoter methylation differed within normal or patient samples dependent upon gender (e.g., Figs. S2(b), S11(a) and S11(b)). Although the anomaly in Fig. S24 was not due to gender because all samples were female, it is reasonable to treat Control 9, 10 and 12 as distinct samples from other controls



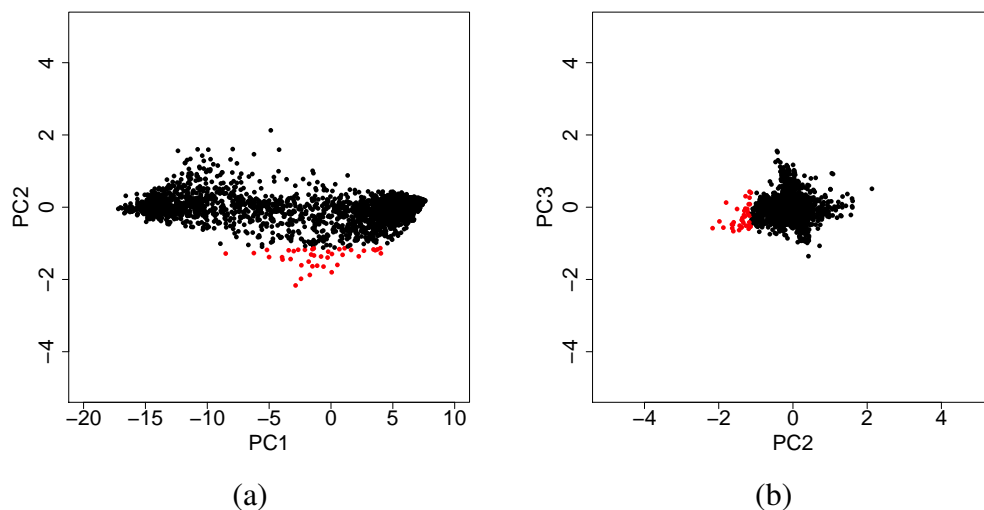

Figure S22: Two dimensional PCA re-embeddings of 3540 probes extracted from GEO ID: GSE41861 after removing genes on the X chromosome. (a) PC1 vs PC2 (b) PC2 vs PC3. Red dots represent genes selected as critical for RA.

because of their unknown biologically distinct features.

Next, we attempted to select genes based on the proposed method. Close examination of Fig. S23(b) shows the hump is directly along the second PC but is slightly tilted (dotted line in Fig. S23(b)). To determine whether this direction represented a distinction between normal controls and SLE patients, we generated combined PC,  $0.7PC2 - 0.3PC3$  (Fig. S24(d)). Although it was not apparent, the new combined PC,  $0.7PC2 - 0.3PC3$ , does represent a distinction between SLE patients and normal controls if we compare Control 9, 10 and 12 or other controls with SLE patients. *P*-values computed by Wilcoxon Rank sum test of combined PC,  $0.7PC2 - 0.3PC3$ , between Control 9, 10 and 12 or other controls and SLE patients were 0.005 and 0.03, respectively. Thus, the difference is statistically significant. Selected genes based on the combined PC (red and green dots in Fig. S23) are listed in Table S9. *P*-values for the number of bold faced genes (i.e., overlaps between Table 2 and S9) were computed by binomial distribution.  $P = 0.02$  and  $0.28$  for red and green dots, respectively. Thus, red dots significantly overlapped with genes selected by the present study (Table 2). Although this coincidence is not very strong, it is remarkable if we consider that samples were taken not from white blood cells as in the present study, but were

extracted from T-cells. Thus, this demonstrates that the PCA based feature extraction method can work for other data sets.

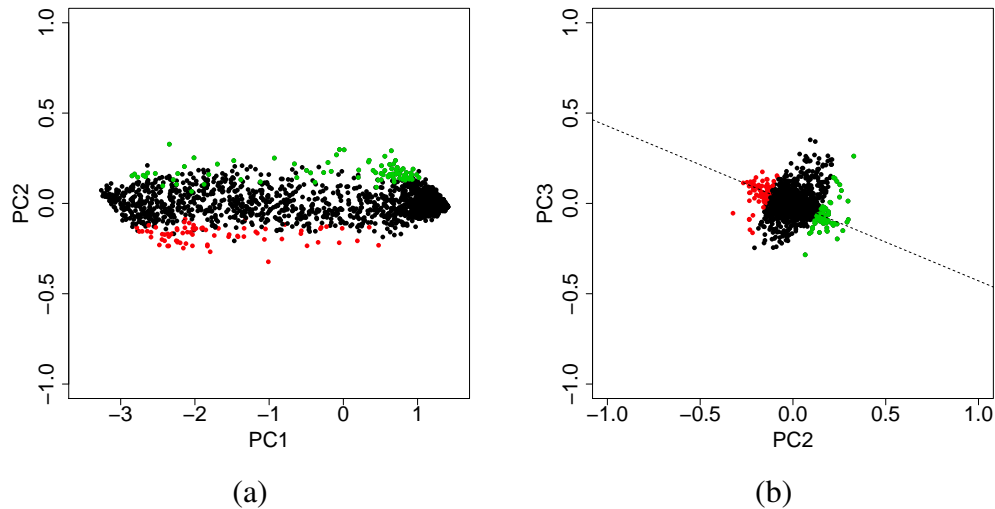

Figure S23: The two dimensional PCA embeddings of 2138 probes extracted from GEO ID: GSE27895. (a) PC1 vs PC2 (b) PC2 vs PC3. Red and green dots represent genes selected as critical for SLE. Dotted line,  $0.7PC2 - 0.3PC3 = 0$ , represents the distinction between normal controls and SLE patients (see text for more details).

## References

- [1] Wang, Y.; Tetko, I. V.; Hall, M. A.; Frank, E.; Facius, A.; Mayer, K. F.; Mewes, H. W. Gene selection from microarray data for cancer classification—a machine learning approach. *Comput Biol Chem* **2005**, *29*, 37–46.
- [2] Diaz-Uriarte, R.; Alvarez de Andres, S. Gene selection and classification of microarray data using random forest. *BMC Bioinformatics* **2006**, *7*, 3.
- [3] Hall, M.; Frank, E.; Holmes, G.; Pfahringer, B.; Reutemann, P.; Witten, I. H. The WEKA Data Mining Software: An Update. *SIGKDD Explorations* **2009**, *11*.
- [4] Diaz-Uriarte, R.; Alvarez de Andres, S. Gene selection and classification of microarray data using random forest. *BMC Bioinformatics* **2006**, *7*, 3.

- [5] Liu, Y. et al. Epigenome-wide association data implicate DNA methylation as an intermediary of genetic risk in rheumatoid arthritis. *Nat. Biotechnol.* **2013**,
- [6] Jeffries, M. A.; Dozmorov, M.; Tang, Y.; Merrill, J. T.; Wren, J. D.; Sawalha, A. H. Genome-wide DNA methylation patterns in CD4+ T cells from patients with systemic lupus erythematosus. *Epigenetics* **2011**, *6*, 593–601.

Table S2:  $\chi^2$ -statistic based feature extraction.

| SLE   |                        | RA     |                | DM     |                      |
|-------|------------------------|--------|----------------|--------|----------------------|
| Score | gene                   | Score  | gene           | Score  | gene                 |
| 19    | CD34_P780_R            | 20     | ABCA1_P45_F    | 10.588 | <b>CARD15_P302_R</b> |
| 19    | CD9_P585_R             | 15.556 | NQO1_E74_R     | 10.588 | ESR1_P151_R          |
| 19    | <b>CSF3R_P8_F</b>      | 15.556 | PLAGL1_P334_F  | 10.588 | IL4_P262_R           |
| 19    | <b>DHCR24_P652_R</b>   | 15.556 | PTGS1_E80_F    | 10.588 | MCAM_P265_R          |
| 19    | EMR3_E61_F             | 15     | CDC25B_E83_F   | 10.588 | <i>PRSS1_E45_R</i>   |
| 19    | EPHA2_P203_F           | 15     | CDH3_P87_R     | 0      |                      |
| 19    | EPHA5_P66_F            | 15     | CDKN1C_P6_R    | 0      |                      |
| 19    | <b>HOXB2_P99_F</b>     | 15     | DLL1_P386_F    | 0      |                      |
| 19    | <b>IFNGR2_P377_R</b>   | 15     | GNMT_E126_F    | 0      |                      |
| 19    | IL10_P348_F            | 15     | IGSF4C_P533_R  | 0      |                      |
| 19    | IL10_P85_F             | 15     | IRAK3_P13_F    | 0      |                      |
| 19    | <b>LMO2_E148_F</b>     | 15     | ONECUT2_P315_R | 0      |                      |
| 19    | <b>LMO2_P794_R</b>     | 15     | PLAU_P176_R    | 0      |                      |
| 19    | MAP3K8_P1036_F         | 15     | TERT_E20_F     | 0      |                      |
| 19    | <b>MMP14_P13_F</b>     | 15     | TK1_E47_F      | 0      |                      |
| 19    | <b>PECAM1_P135_F</b>   | 12.381 | APC_E117_R     | 0      |                      |
| 19    | PMP22_P1254_F          | 12.381 | ARHGAP9_P260_F | 0      |                      |
| 19    | <b>RARA_P1076_R</b>    | 12.381 | E2F3_P840_R    | 0      |                      |
| 19    | <b>S100A2_E36_R</b>    | 12.381 | EDN1_E50_R     | 0      |                      |
| 19    | <b>SLC22A18_P216_R</b> | 12.381 | FVT1_P225_F    | 0      |                      |
| 19    | <b>SPI1_E205_F</b>     | 12.381 | IL12B_P1453_F  | 0      |                      |
| 19    | <b>SPI1_P48_F</b>      | 12.381 | ITGB1_P451_F   | 0      |                      |
| 19    | <b>SPI1_P48_F</b>      | 12.381 | JAK3_P156_R    | 0      |                      |
|       |                        | 12.381 | PLAU_P11_F     | 0      |                      |
|       |                        | 12.381 | TES_E172_F     | 0      |                      |
|       |                        | 12.381 | TNC_P198_F     | 0      |                      |

Table S3: InfoGain based feature extraction.

| SLE   |                        | RA    |                | DM    |                      |
|-------|------------------------|-------|----------------|-------|----------------------|
| Score | gene                   | Score | gene           | Score | gene                 |
| 0.831 | CD34_P780_R            | 0.811 | ABCA1_P45_F    | 0.367 | <b>CARD15_P302_R</b> |
| 0.831 | CD9_P585_R             | 0.616 | NQO1_E74_R     | 0.367 | ESR1_P151_R          |
| 0.831 | <b>CSF3R_P8_F</b>      | 0.616 | PLAGL1_P334_F  | 0.367 | IL4_P262_R           |
| 0.831 | <b>DHCR24_P652_R</b>   | 0.616 | PTGS1_E80_F    | 0.367 | MCAM_P265_R          |
| 0.831 | EMR3_E61_F             | 0.541 | CDC25B_E83_F   | 0.367 | PRSS1_E45_R          |
| 0.831 | EPHA2_P203_F           | 0.541 | CDH3_P87_R     | 0     |                      |
| 0.831 | EPHA5_P66_F            | 0.541 | CDKN1C_P6_R    | 0     |                      |
| 0.831 | <b>HOXB2_P99_F</b>     | 0.541 | DLL1_P386_F    | 0     |                      |
| 0.831 | <b>IFNGR2_P377_R</b>   | 0.541 | GNMT_E126_F    | 0     |                      |
| 0.831 | IL10_P348_F            | 0.541 | IGSF4C_P533_R  | 0     |                      |
| 0.831 | IL10_P85_F             | 0.541 | IRAK3_P13_F    | 0     |                      |
| 0.831 | <b>LMO2_P794_R</b>     | 0.541 | ONECUT2_P315_R | 0     |                      |
| 0.831 | <b>LMO2_E148_F</b>     | 0.541 | PLAU_P176_R    | 0     |                      |
| 0.831 | MAP3K8_P1036_F         | 0.541 | TERT_E20_F     | 0     |                      |
| 0.831 | <b>MMP14_P13_F</b>     | 0.541 | TK1_E47_F      | 0     |                      |
| 0.831 | <b>PECAM1_P135_F</b>   | 0.509 | APC_E117_R     | 0     |                      |
| 0.831 | PMP22_P1254_F          | 0.509 | ARHGAP9_P260_F | 0     |                      |
| 0.831 | <b>RARA_P1076_R</b>    | 0.509 | E2F3_P840_R    | 0     |                      |
| 0.831 | <b>SLC22A18_P216_R</b> | 0.509 | EDN1_E50_R     | 0     |                      |
| 0.831 | <b>SPI1_E205_F</b>     | 0.509 | FVT1_P225_F    | 0     |                      |
| 0.831 | <b>SPI1_P48_F</b>      | 0.509 | IL12B_P1453_F  | 0     |                      |
| 0.831 | <b>S100A2_E36_R</b>    | 0.509 | ITGB1_P451_F   | 0     |                      |
| 0.831 | <b>SPI1_P48_F</b>      | 0.509 | JAK3_P156_R    | 0     |                      |
|       |                        | 0.509 | PLAU_P11_F     | 0     |                      |
|       |                        | 0.509 | TES_E172_F     | 0     |                      |
|       |                        | 0.509 | TNC_P198_F     | 0     |                      |

Table S4: Relief based feature extraction.

| SLE   |                        | RA    |                | DM    |                      |
|-------|------------------------|-------|----------------|-------|----------------------|
| Score | gene                   | Score | gene           | Score | gene                 |
| 1     | CD34_P780_R            | 1     | ABCA1_P45_F    | 0.45  | <b>CARD15_P302_R</b> |
| 1     | CD9_P585_R             | 0.87  | NQO1_E74_R     | 0.45  | ESR1_P151_R          |
| 1     | <b>CSF3R_P8_F</b>      | 0.87  | PTGS1_E80_F    | 0.45  | IL4_P262_R           |
| 1     | <b>DHCR24_P652_R</b>   | 0.825 | PLAGL1_P334_F  | 0.45  | MCAM_P265_R          |
| 1     | EMR3_E61_F             | 0.76  | E2F3_P840_R    | 0.45  | PRSS1_E45_R          |
| 1     | EPHA2_P203_F           | 0.76  | ITGB1_P451_F   | 0     |                      |
| 1     | EPHA5_P66_F            | 0.76  | JAK3_P156_R    | 0     |                      |
| 1     | <b>HOXB2_P99_F</b>     | 0.76  | PLAU_P11_F     | 0     |                      |
| 1     | <b>IFNGR2_P377_R</b>   | 0.75  | APC_E117_R     | 0     |                      |
| 1     | IL10_P348_F            | 0.75  | FVT1_P225_F    | 0     |                      |
| 1     | IL10_P85_F             | 0.75  | IL12B_P1453_F  | 0     |                      |
| 1     | <b>LMO2_E148_F</b>     | 0.74  | ARHGAP9_P260_F | 0     |                      |
| 1     | <b>LMO2_P794_R</b>     | 0.705 | EDN1_E50_R     | 0     |                      |
| 1     | MAP3K8_P1036_F         | 0.7   | CDC25B_E83_F   | 0     |                      |
| 1     | <b>MMP14_P13_F</b>     | 0.7   | CDH3_P87_R     | 0     |                      |
| 1     | <b>PECAM1_P135_F</b>   | 0.7   | CDKN1C_P6_R    | 0     |                      |
| 1     | PMP22_P1254_F          | 0.7   | DLL1_P386_F    | 0     |                      |
| 1     | <b>RARA_P1076_R</b>    | 0.7   | GNMT_E126_F    | 0     |                      |
| 1     | <b>S100A2_E36_R</b>    | 0.7   | IGSF4C_P533_R  | 0     |                      |
| 1     | <b>SLC22A18_P216_R</b> | 0.7   | IRAK3_P13_F    | 0     |                      |
| 1     | <b>SPI1_E205_F</b>     | 0.7   | ONECUT2_P315_R | 0     |                      |
| 1     | <b>SPI1_P48_F</b>      | 0.7   | PLAU_P176_R    | 0     |                      |
| 1     | <b>SPI1_P48_F</b>      | 0.7   | TERT_E20_F     | 0     |                      |
|       |                        | 0.7   | TK1_E47_F      | 0     |                      |

Table S5: Symmetrical Uncertainty based feature extraction.

| SLE   |                        | RA    |                | DM    |                      |
|-------|------------------------|-------|----------------|-------|----------------------|
| Score | gene                   | Score | gene           | Score | gene                 |
| 1     | CD34_P780_R            | 1     | ABCA1_P45_F    | 0.517 | <b>CARD15_P302_R</b> |
| 1     | CD9_P585_R             | 0.728 | NQO1_E74_R     | 0.517 | ESR1_P151_R          |
| 1     | <b>CSF3R_P8_F</b>      | 0.728 | PLAGL1_P334_F  | 0.517 | IL4_P262_R           |
| 1     | <b>DHCR24_P652_R</b>   | 0.728 | PTGS1_E80_F    | 0.517 | MCAM_P265_R          |
| 1     | EMR3_E61_F             | 0.706 | CDC25B_E83_F   | 0.517 | PRSS1_E45_R          |
| 1     | EPHA2_P203_F           | 0.706 | CDH3_P87_R     |       |                      |
| 1     | EPHA5_P66_F            | 0.706 | CDKN1C_P6_R    |       |                      |
| 1     | <b>HOXB2_P99_F</b>     | 0.706 | DLL1_P386_F    |       |                      |
| 1     | <b>IFNGR2_P377_R</b>   | 0.706 | GNMT_E126_F    |       |                      |
| 1     | IL10_P348_F            | 0.706 | IGSF4C_P533_R  |       |                      |
| 1     | IL10_P85_F             | 0.706 | IRAK3_P13_F    |       |                      |
| 1     | <b>LMO2_E148_F</b>     | 0.706 | ONECUT2_P315_R |       |                      |
| 1     | <b>LMO2_P794_R</b>     | 0.706 | PLAU_P176_R    |       |                      |
| 1     | MAP3K8_P1036_F         | 0.706 | TERT_E20_F     |       |                      |
| 1     | <b>MMP14_P13_F</b>     | 0.706 | TK1_E47_F      |       |                      |
| 1     | <b>PECAM1_P135_F</b>   | 0.583 | APC_E117_R     |       |                      |
| 1     | PMP22_P1254_F          | 0.583 | ARHGAP9_P260_F |       |                      |
| 1     | <b>RARA_P1076_R</b>    | 0.583 | E2F3_P840_R    |       |                      |
| 1     | <b>S100A2_E36_R</b>    | 0.583 | EDN1_E50_R     |       |                      |
| 1     | <b>SLC22A18_P216_R</b> | 0.583 | FVT1_P225_F    |       |                      |
| 1     | <b>SPI1_E205_F</b>     | 0.583 | IL12B_P1453_F  |       |                      |
| 1     | <b>SPI1_P48_F</b>      | 0.583 | ITGB1_P451_F   |       |                      |
| 1     | <b>SPI1_P48_F</b>      | 0.583 | JAK3_P156_R    |       |                      |
|       |                        | 0.583 | PLAU_P11_F     |       |                      |
|       |                        | 0.583 | TES_E172_F     |       |                      |
|       |                        | 0.583 | TNC_P198_F     |       |                      |

Table S6: CFS based feature extraction

| SLE                    | RA                    | DM                    |
|------------------------|-----------------------|-----------------------|
| <i>ABCC2_P88_F</i>     | <i>ABCA1_P45_F</i>    | <i>BCAP31_P1072_F</i> |
| <i>ACTG2_E98_R</i>     | <i>ARHGAP9_P518_R</i> | <b>CARD15_P302_R</b>  |
| <b>AIM2_P624_F</b>     | <i>CDC25B_E83_F</i>   | <i>E2F3_P840_R</i>    |
| <i>ATP10A_P147_F</i>   | <i>GABRA5_E44_R</i>   | <i>ESR1_P151_R</i>    |
| <i>BIRC4_P500_F</i>    | <i>IGSF4C_P533_R</i>  |                       |
| <i>BTK_P105_F</i>      | <i>KLK10_P268_R</i>   |                       |
| <i>CD34_P780_R</i>     | <i>NQO1_E74_R</i>     |                       |
| <i>CD82_P557_R</i>     | <i>PLAGL1_P334_F</i>  |                       |
| <i>CD9_P585_R</i>      | <i>PTGS1_E80_F</i>    |                       |
| <b>CSF3R_P8_F</b>      | <i>TES_E172_F</i>     |                       |
| <b>DHCR24_P652_R</b>   | <i>TK1_E47_F</i>      |                       |
| <i>EMR3_E61_F</i>      |                       |                       |
| <i>EPHA2_P203_F</i>    |                       |                       |
| <i>EPHA5_P66_F</i>     |                       |                       |
| <i>EPHB2_P165_R</i>    |                       |                       |
| <i>HDAC9_P137_R</i>    |                       |                       |
| <b>HOXB2_P99_F</b>     |                       |                       |
| <i>HPN_P374_R</i>      |                       |                       |
| <i>HTR1B_E232_R</i>    |                       |                       |
| <b>IFNGR2_P377_R</b>   |                       |                       |
| <i>IGFBP6_P328_R</i>   |                       |                       |
| <i>IL10_P348_F</i>     |                       |                       |
| <i>IL10_P85_F</i>      |                       |                       |
| <b>LMO2_E148_F</b>     |                       |                       |
| <i>LMO2_P794_R</i>     |                       |                       |
| <i>MAP3K8_P1036_F</i>  |                       |                       |
| <b>MMP14_P13_F</b>     |                       |                       |
| <b>PECAM1_P135_F</b>   |                       |                       |
| <i>PMP22_P1254_F</i>   |                       |                       |
| <b>RARA_P1076_R</b>    |                       |                       |
| <b>S100A2_E36_R</b>    |                       |                       |
| <b>SLC22A18_P216_R</b> |                       |                       |
| <i>SPI1_E205_F</i>     |                       |                       |
| <i>SPI1_P48_F</i>      |                       |                       |
| <i>SPI1_P48_F</i>      |                       |                       |
| <i>TES_E172_F</i>      |                       |                       |



Table S7: Wrapper based feature extraction.

|             | SLE                                        | RA          | DM                                          |
|-------------|--------------------------------------------|-------------|---------------------------------------------|
| J48         | CD34_P780_R                                | ABCA1_P45_F | IL4_P262_R                                  |
| Naive Bayes | CD9_P585_R                                 | ABCA1_P45_F | CCNC_P132_R<br>CDKN2B_E220_F<br>IGFBP5_P9_R |
| SMO         | CD34_P780_R<br>IMPACT_P186_F<br>TES_E172_F | ABCA1_P45_F | AATK_E63_R<br>MYH11_P22_F<br>NGFR_P355_F    |

Table S8: Random forest based feature selection. *N* represents the selection frequencies of each gene during 100 trials.

| SLE                    |    | RA             |     | DM                   |    |
|------------------------|----|----------------|-----|----------------------|----|
| gene                   | N  | gene           | N   | gene                 | N  |
| <b>S100A2_E36_R</b>    | 18 | ABCA1_P45_F    | 100 | ESR1_P151_R          | 61 |
| EMR3_E61_F             | 18 | PTGS1_E80_F    | 42  | IL4_P262_R           | 61 |
| <b>LMO2_E148_F</b>     | 18 | NQO1_E74_R     | 36  | PRSS1_E45_R          | 51 |
| <b>SPI1_P48_F</b>      | 16 | PLAGL1_P334_F  | 34  | NGFR_P355_F          | 23 |
| <b>CSF3R_P8_F</b>      | 16 | IGSF4C_P533_R  | 9   | MCAM_P265_R          | 15 |
| <b>LMO2_P794_R</b>     | 15 | ONECUT2_P315_R | 5   | LYN_P241_F           | 13 |
| CD9_P585_R             | 13 | DLL1_P386_F    | 4   | SNRPN_seq_12_S127_F  | 6  |
| <b>DHCR24_P652_R</b>   | 13 | GNMT_E126_F    | 4   | <b>CARD15_P302_R</b> | 6  |
| EPHA2_P203_F           | 13 | CDKN1C_P6_R    | 3   | FGF6_E294_F          | 4  |
| <b>HOXB2_P99_F</b>     | 13 | PLAU_P176_R    | 2   | HLA-DOB_E432_R       | 3  |
| CD34_P780_R            | 12 | TK1_E47_F      | 2   | IPF1_P750_F          | 3  |
| MAP3K8_P1036_F         | 12 | CDC25B_E83_F   | 2   | MAD2L1_E93_F         | 3  |
| IL10_P85_F             | 11 | IRAK3_P13_F    | 2   | TES_P182_F           | 2  |
| <b>MMP14_P13_F</b>     | 9  | TES_E172_F     | 1   | FGF9_P862_R          | 2  |
| PMP22_P1254_F          | 8  |                |     | ARHGAP9_P518_R       | 2  |
| <b>RARA_P1076_R</b>    | 8  |                |     | MMP7_E59_F           | 2  |
| <b>SYK_P584_F</b>      | 8  |                |     | BCAP31_P1072_F       | 2  |
| IL10_P348_F            | 8  |                |     | PENK_E26_F           | 1  |
| <b>PECAM1_P135_F</b>   | 7  |                |     | PTHR1_P258_F         | 1  |
| <b>IFNGR2_P377_R</b>   | 7  |                |     | RASGRF1_P768_F       | 1  |
| <b>SPI1_E205_F</b>     | 5  |                |     | TGFB1_P833_R         | 1  |
| EPHA5_P66_F            | 5  |                |     | ELK3_P514_F          | 1  |
| <b>SLC22A18_P216_R</b> | 3  |                |     | FGR_P39_F            | 1  |
|                        |    |                |     | IGFBP5_P9_R          | 1  |

Table S9: Genes selected in RA samples (red dots in Fig. S20) and SLE samples (red and green dots in Fig. S23).  $N$  is the number of probes selected and annotated to the gene.

| RA (red)       |     | SLE (red)       |     |               |     | SLE (green)     |     |             |     |
|----------------|-----|-----------------|-----|---------------|-----|-----------------|-----|-------------|-----|
| gene           | $N$ | gene            | $N$ | gene          | $N$ | gene            | $N$ | gene        | $N$ |
| <b>ERCC3</b>   | 2   | ATP10A          | 4   | <b>CHFR</b>   | 3   | DCC             | 4   | CASP8       | 3   |
| <b>IFNGR2</b>  | 2   | <b>HOXB2</b>    | 2   | <b>MMP8</b>   | 2   | <b>SLC22A18</b> | 2   | H19         | 2   |
| <b>RARA</b>    | 2   | DAPK1           | 2   | DIRAS3        | 2   | IL8             | 2   | <b>AIM2</b> | 1   |
| FGR            | 2   | GNAS            | 2   | KCNQ1         | 2   | <b>RARA</b>     | 1   | <b>SPP1</b> | 1   |
| IL10           | 2   | MGMT            | 2   | PEG10         | 2   | ABCG2           | 1   | ACVR1B      | 1   |
| TP73           | 2   | WT1             | 2   | <b>CARD15</b> | 1   | ATP10A          | 1   | APC         | 1   |
| <b>DHCR24</b>  | 1   | <b>CSF3R</b>    | 1   | <b>MPL</b>    | 1   | BCAP31          | 1   | BRCA1       | 1   |
| <b>HOXB2</b>   | 1   | <b>SLC22A18</b> | 1   | ABCC2         | 1   | CALCA           | 1   | CASP10      | 1   |
| <b>IFNGR2</b>  | 1   | ACVR1           | 1   | AFP           | 1   | CCND1           | 1   | CD2         | 1   |
| <b>LCN2</b>    | 1   | AR              | 1   | ASB4          | 1   | CDKN2A          | 1   | CHD2        | 1   |
| <b>LMO2</b>    | 1   | B3GALT5         | 1   | BCL2A1        | 1   | CHI3L2          | 1   | COL6A1      | 1   |
| <b>MMP14</b>   | 1   | BLK             | 1   | BRCA1         | 1   | DIRAS3          | 1   | DSP         | 1   |
| <b>PI3</b>     | 1   | CCKAR           | 1   | CCNC          | 1   | EPHA3           | 1   | EPHA7       | 1   |
| <b>S100A12</b> | 1   | CXCL9           | 1   | DDR2          | 1   | EPHB6           | 1   | ERBB2       | 1   |
| AGXT           | 1   | DMP1            | 1   | EDNRB         | 1   | ERCC1           | 1   | ERG         | 1   |
| AREG           | 1   | FANCG           | 1   | FGR           | 1   | ESR1            | 1   | ETS2        | 1   |
| CD9            | 1   | FHL1            | 1   | FMR1          | 1   | FER             | 1   | FGF1        | 1   |
| ENC1           | 1   | FRK             | 1   | GABRA5        | 1   | FGF2            | 1   | FGFR4       | 1   |
| EPHA2          | 1   | GSTP1           | 1   | H19           | 1   | FLI1            | 1   | GPATC3      | 1   |
| EXT1           | 1   | HLA-DOB         | 1   | HSPA2         | 1   | HDAC6           | 1   | HFE         | 1   |
| FER            | 1   | HTR2A           | 1   | LIG4          | 1   | HLA-DPB1        | 1   | IGF2AS      | 1   |
| FLI1           | 1   | IL1RN           | 1   | IL3           | 1   | IGFBP7          | 1   | INSR        | 1   |
| GFI1           | 1   | IL10            | 1   | KRT1          | 1   | IRF7            | 1   | ITK         | 1   |
| GNMT           | 1   | MAPK9           | 1   | MC2R          | 1   | KCNQ1           | 1   | KLK11       | 1   |
| GPX3           | 1   | MGMT            | 1   | MUC1          | 1   | MAGEL2          | 1   | MAP2K6      | 1   |
| GSTP1          | 1   | NID1            | 1   | NOS3          | 1   | MGMT            | 1   | MLH1        | 1   |
| HOXA9          | 1   | SGCE            | 1   | SNRPN         | 1   | MME             | 1   | MMP10       | 1   |
| ISL1           | 1   | TIMP3           | 1   | TNK1          | 1   | MYLK            | 1   | PDE1B       | 1   |
| NPR2           | 1   | TP73            | 1   | WNT8B         | 1   | PLAGL1          | 1   | PEG10       | 1   |
| NR2F6          | 1   | XRCC2           | 1   | ZIM2          | 1   | PLAGL1          | 1   | PRKCDBP     | 1   |
| NRG1           | 1   |                 |     |               |     | PTGS1           | 1   | RAD50       | 1   |
| PIK3R1         | 1   |                 |     |               |     | RAD54B          | 1   | RIPK4       | 1   |
| PRSS8          | 1   |                 |     |               |     | RUNX3           | 1   | SEMA3B      | 1   |
| SFTPD          | 1   |                 |     |               |     | SNRPN           | 1   | SOX17       | 1   |
|                |     |                 |     |               |     | TEK             | 1   | TFRC        | 1   |
|                |     |                 |     |               |     | TFPI2           | 1   | TGFB2       | 1   |
|                |     |                 |     |               |     | TJP2            | 1   | THBS1       | 1   |
|                |     |                 |     |               |     | TNC             | 1   | TNFRSF10C   | 1   |
|                |     |                 |     |               |     | TRIM29          | 1   | VEGFB       | 1   |

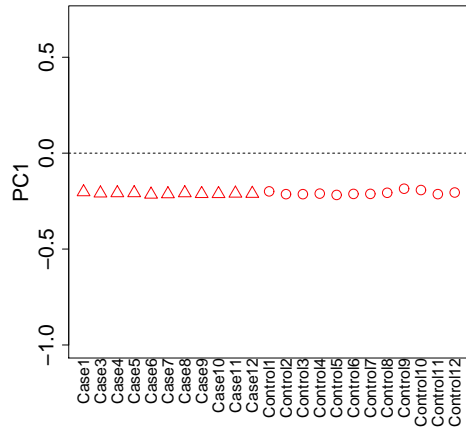

(a)

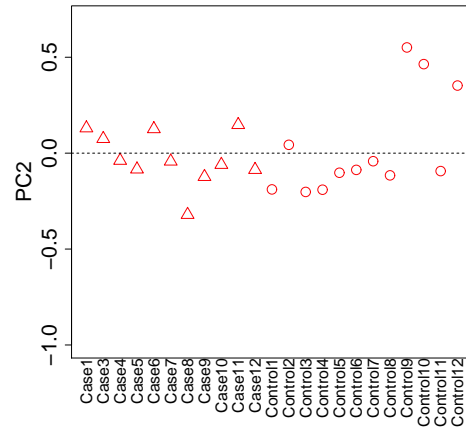

(b)

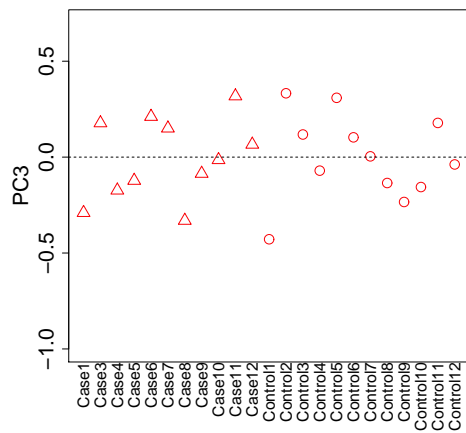

(c)

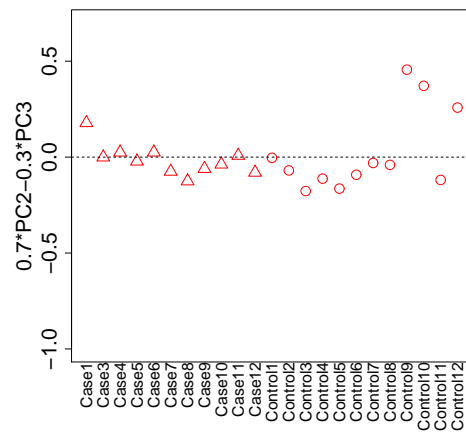

(d)

Figure S24: The first (a), second (b) and third (c) principal components. Red triangles and circles represent SLE patients and normal controls, respectively. (d) The combined PC,  $0.7*PC2 - 0.3*PC3$ , represents the distinction between SLE patients and normal controls.
